# Supplementary material for: Arctic Ocean Simulations in the CMIP6 Ocean Model Intercomparison Project (OMIP)
Source: Copernicus journal article supplement (doi:10.5194/gmd-2022-260), 2022-10-27
Supplement: Supplementary file 1 [file gmd-2022-260-supplement.pdf]

*Supplement of*

**Arctic Ocean Simulations in the CMIP6 Ocean Model  
5 Intercomparison Project (OMIP)**

Qi Shu<sup>1,2,3</sup>, Qiang Wang<sup>4</sup>, Chuncheng Guo<sup>5</sup>, Zhenya Song<sup>1,2,3</sup>, Shizhu Wang<sup>1,2,3</sup>, Yan He<sup>1,2,3</sup>, Fangli Qiao<sup>1,2,3</sup>

<sup>1</sup>First Institute of Oceanography, and Key Laboratory of Marine Science and Numerical Modeling, Ministry of Natural Resources, Qingdao, 266061, China

10 <sup>2</sup>Laboratory for Regional Oceanography and Numerical Modeling, Pilot National Laboratory for Marine Science and Technology, Qingdao, 266067, China

<sup>3</sup>Shandong Key Laboratory of Marine Science and Numerical Modeling, Qingdao, 266061, China

<sup>4</sup>Alfred Wegener Institute Helmholtz Centre for Polar and Marine Research (AWI), Bremerhaven, 27570, Germany

<sup>5</sup>NORCE Norwegian Research Centre, Bjerknes Centre for Climate Research, Bergen, 5007, Norway

15 *Correspondence to:* Qi Shu (shuqi@fio.org.cn)

## Supporting Information

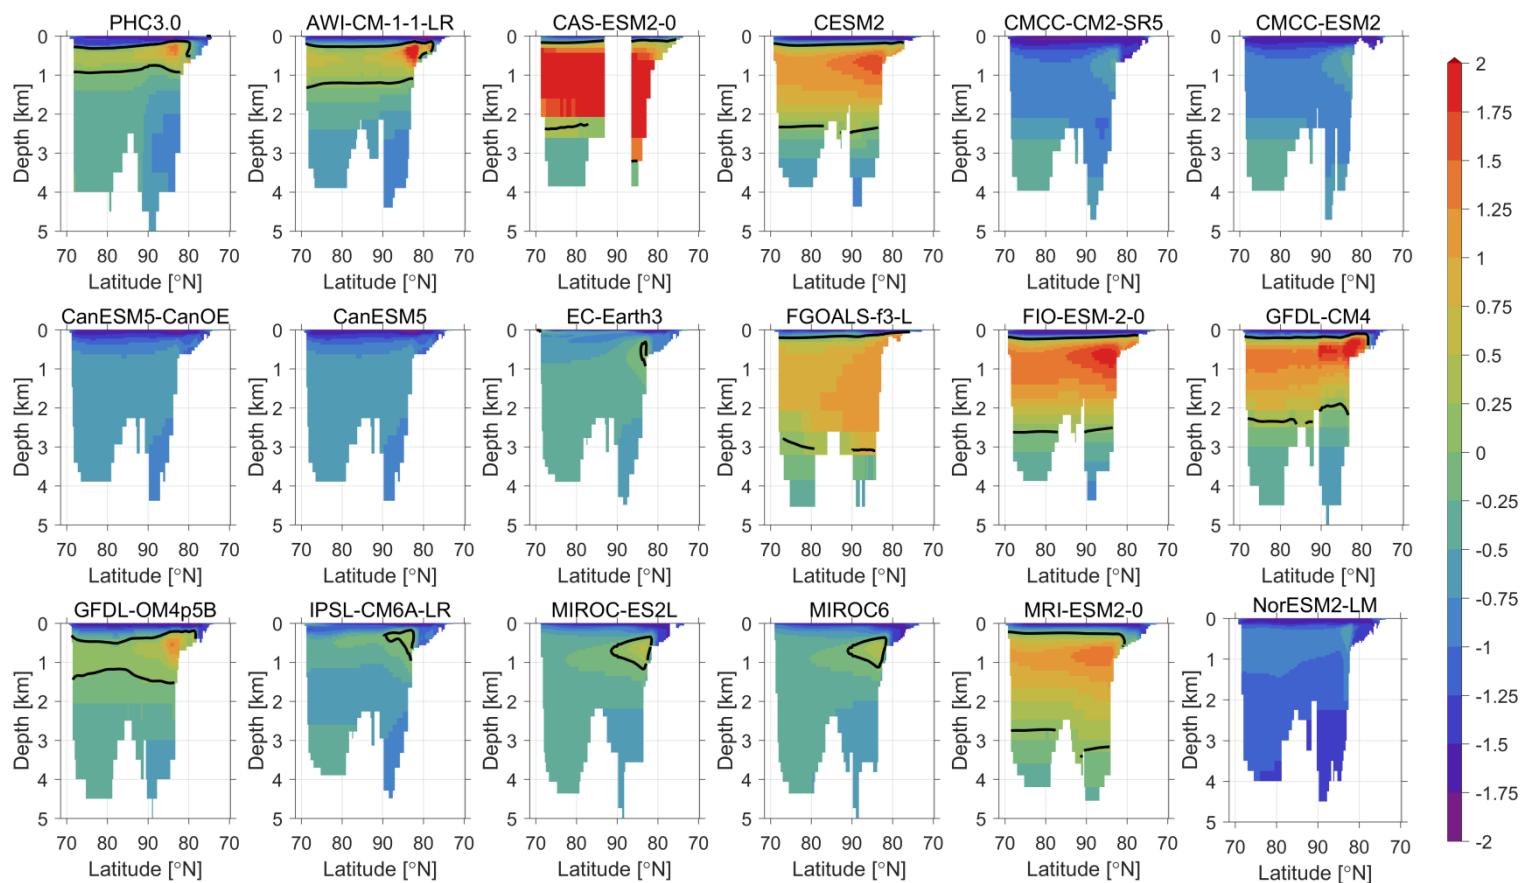

20 **Figure S1. Potential temperature (unit: °C) along section S (Fig. 1) from the PHC3.0 climatology and OMIP-1 models averaged from 1971 to 2000. Black line is the 0 °C isotherm.**

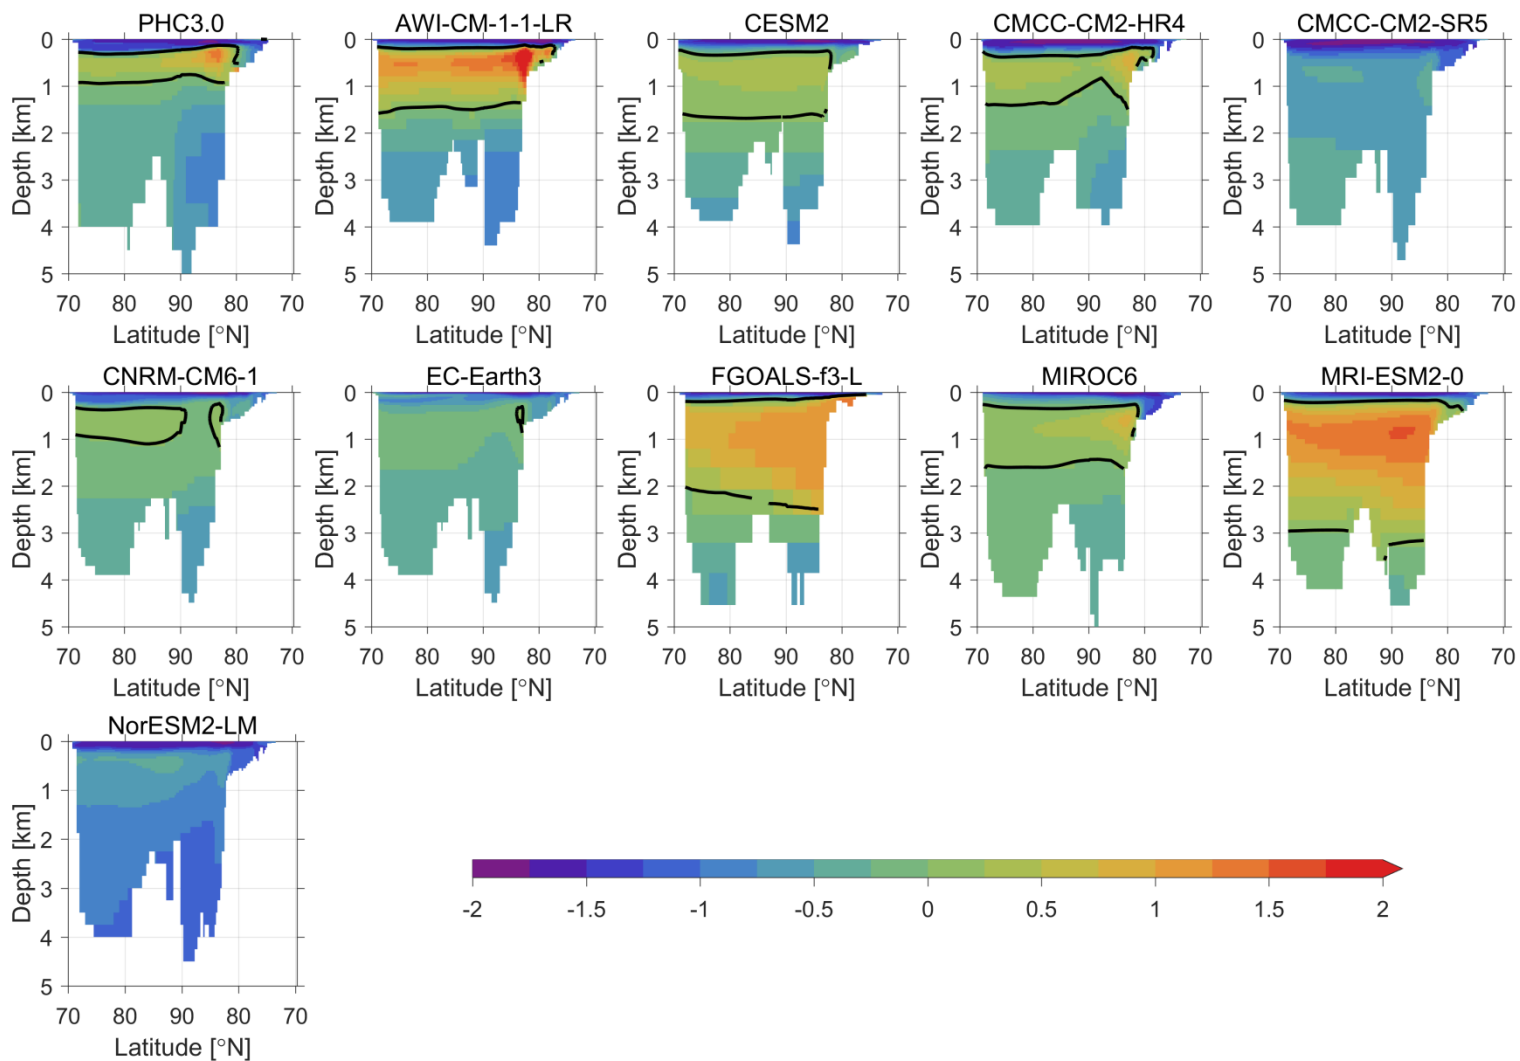

**Figure S2. Potential temperature (unit: °C) along section S (Fig. 1) from the PHC3.0 climatology and OMIP-2 models averaged from 1971 to 2000. Black line is the 0 °C isotherm.**

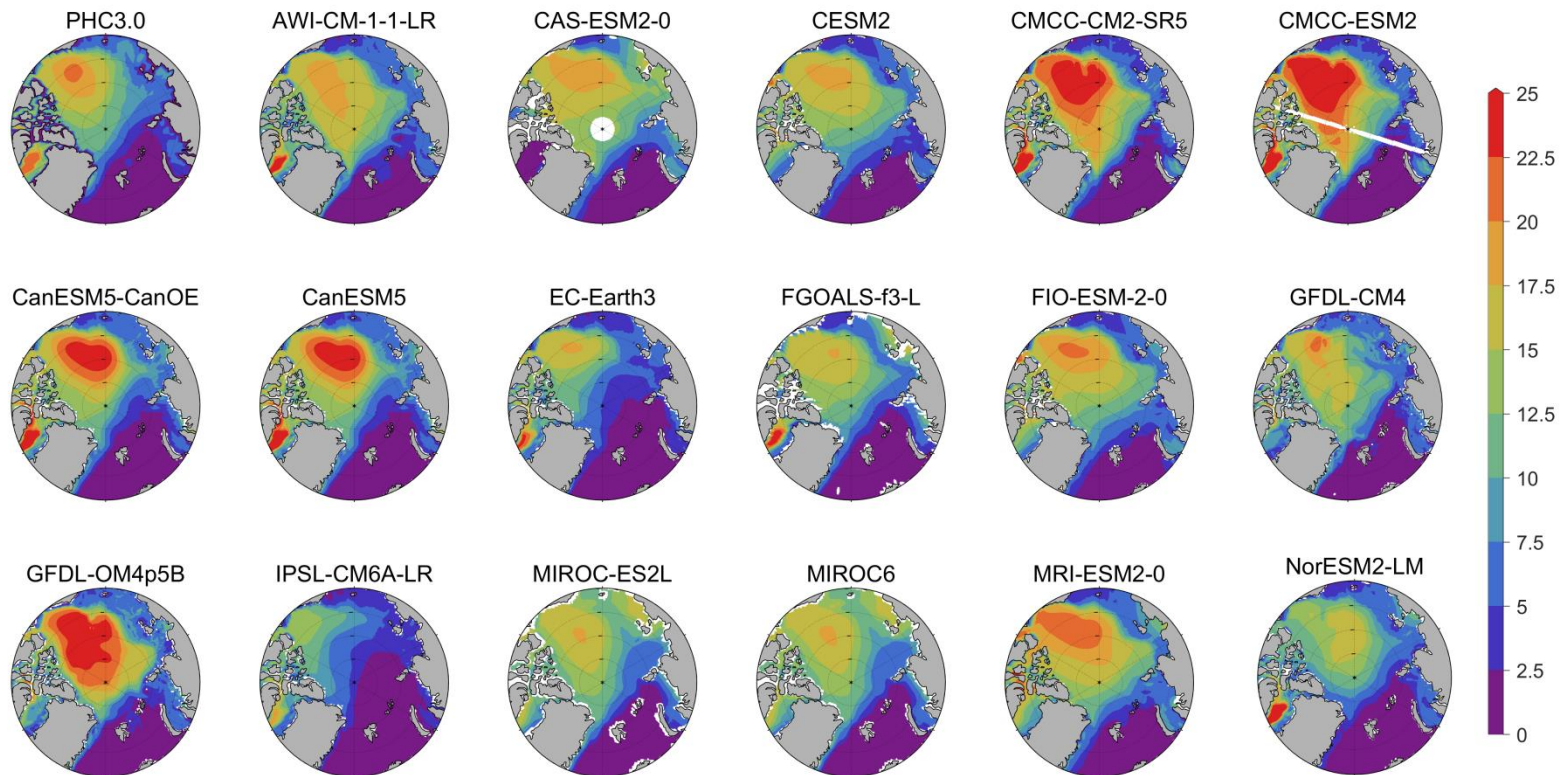

Figure S3. Liquid freshwater column (unit: m) from PHC3.0 climatology and OMIP-1 models averaged over 1971 to 2000.

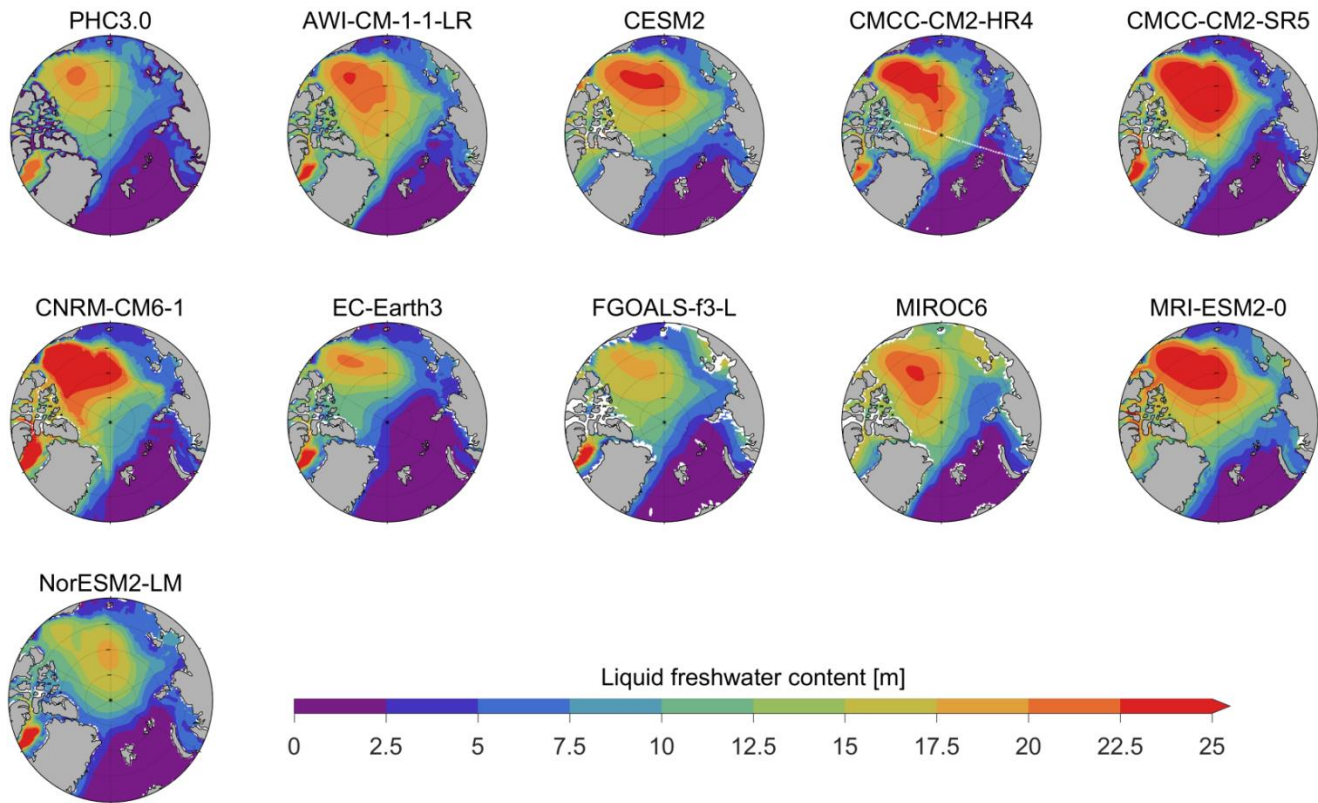

Figure S4. Liquid freshwater column (unit: m) from PHC3.0 climatology and OMIP-2 models averaged over 1971 to 2000.

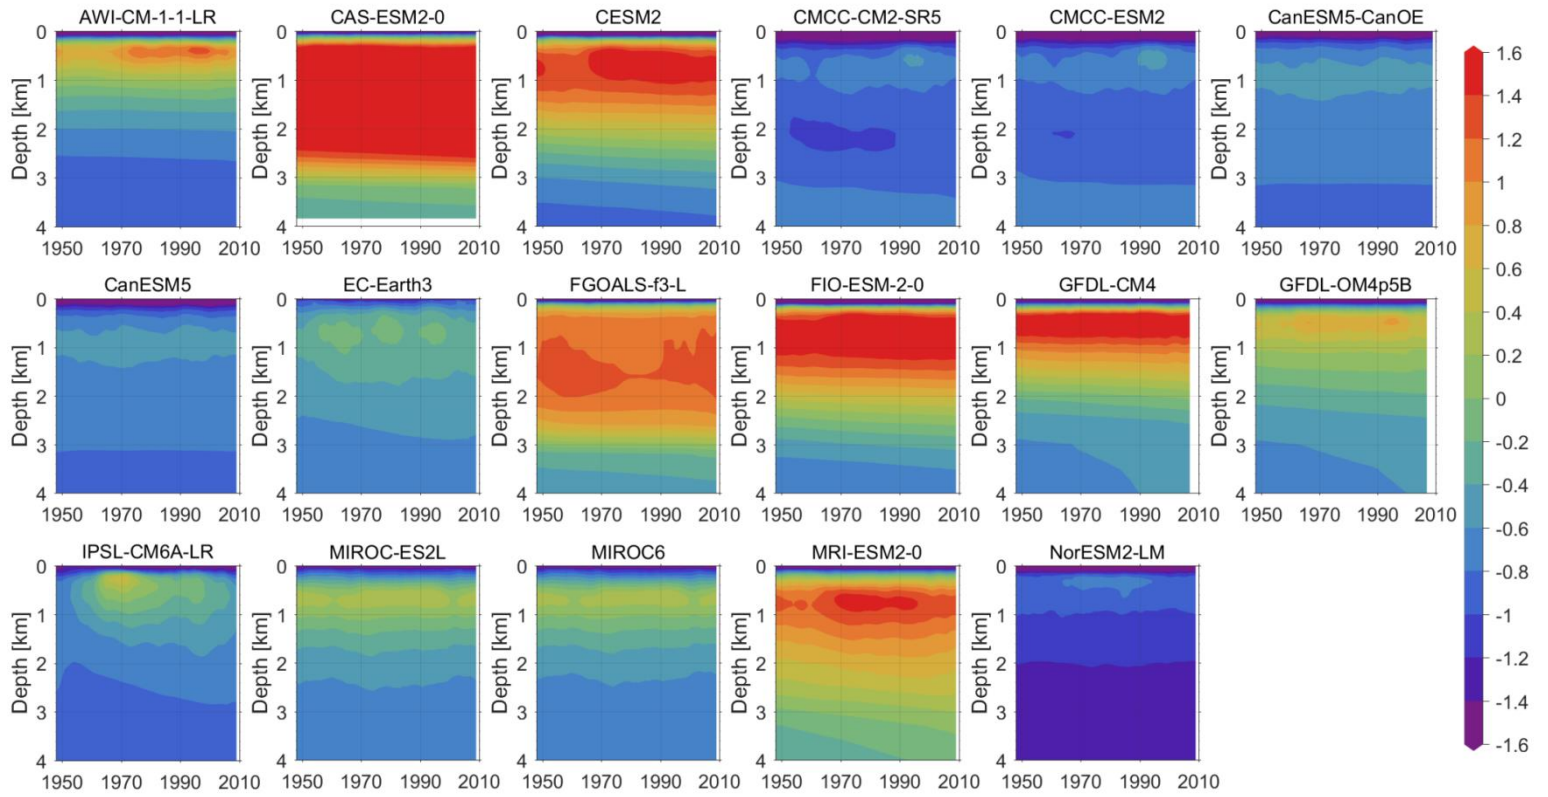

30

**Figure S5. Hovmöller diagram of basin-mean potential temperature (unit: °C) for the Eurasian Basin from OMIP-1 models.**

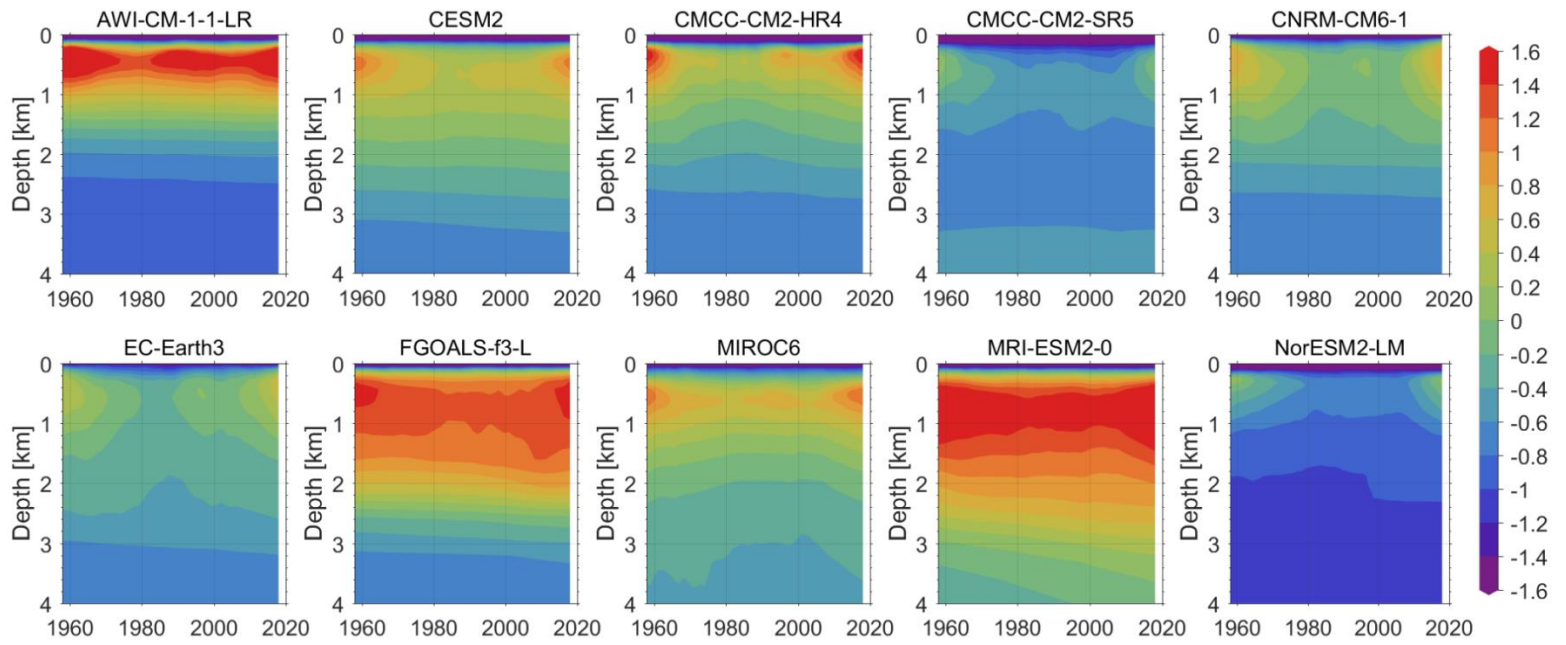

**Figure S6. Hovmöller diagram of basin-mean potential temperature (unit: °C) for the Eurasian Basin from OMIP-2 models.**

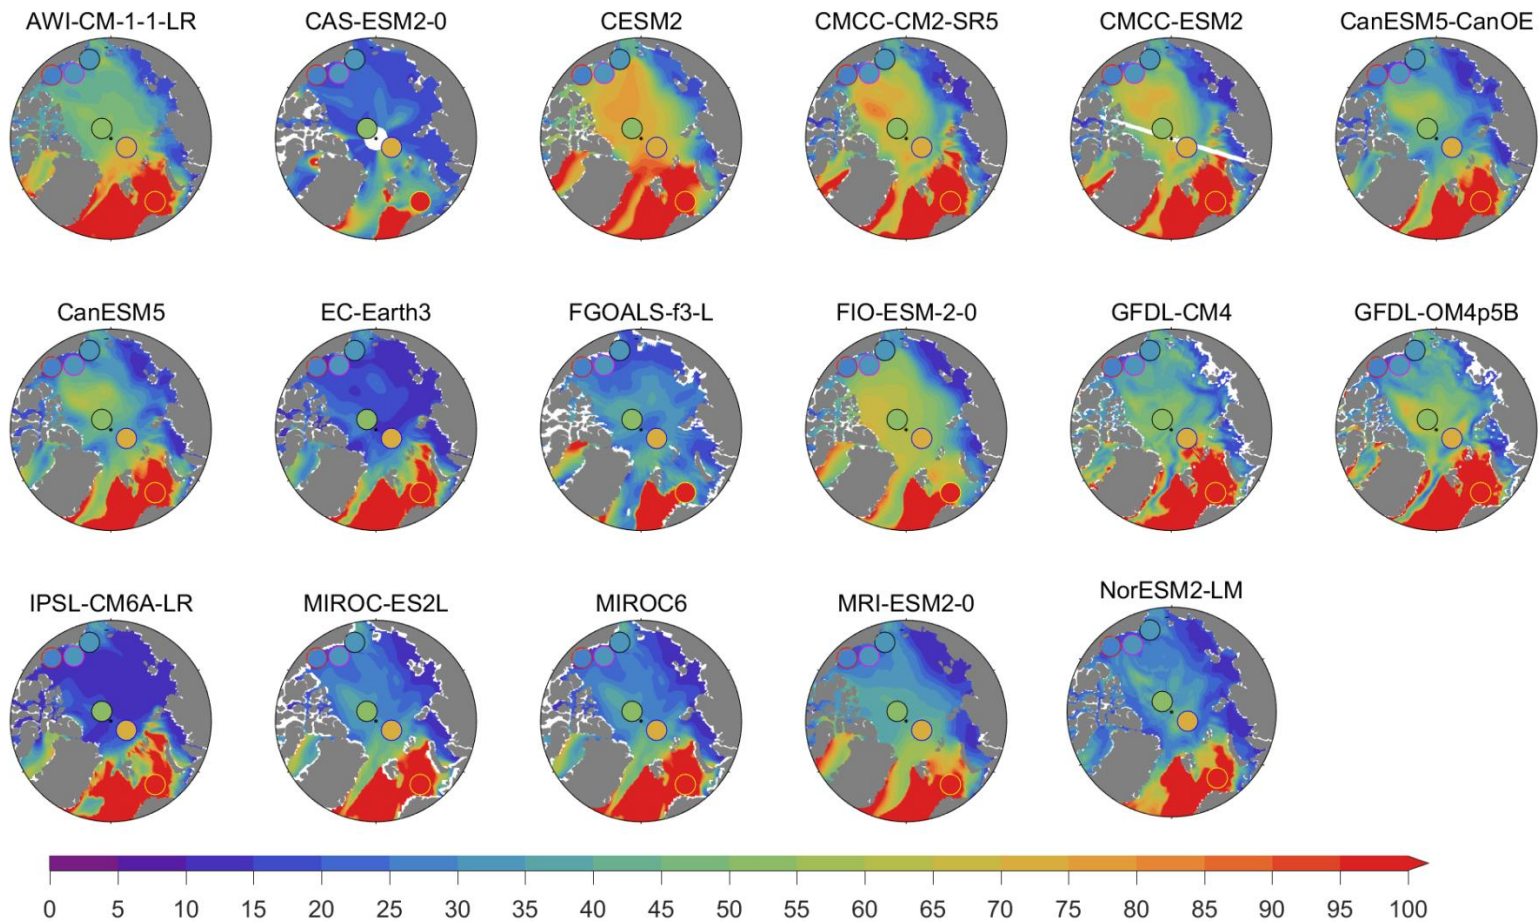

35 **Figure S7. Cold season (November-May) mixed layer depth (unit: m) from OMIP-1 and observations (dots). The average period for OMIP-1 is from 1979 to 2009 and the observations are based on the period of 1979 to 2012.**



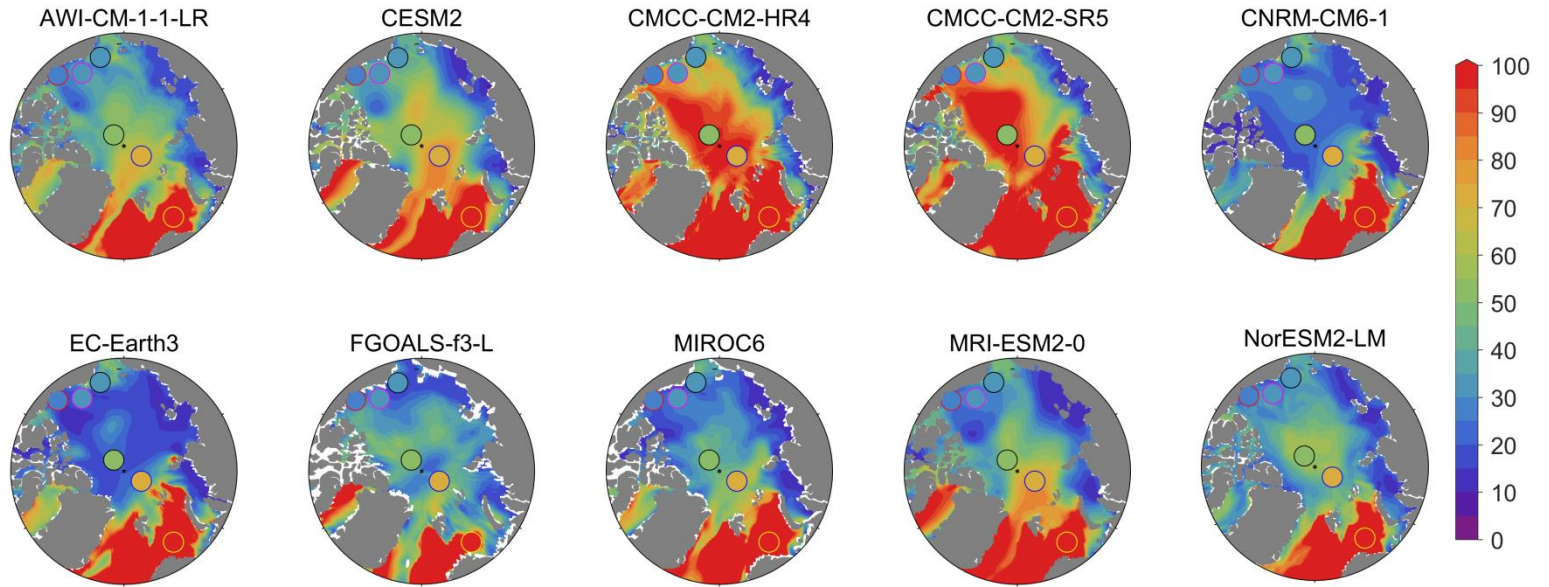

**Figure S8. Cold season (November-May) mixed layer depth (unit: m) from OMIP-2 and observations (dots). The average period for OMIP-2 is from 1979 to 2012 and the observations are based on the period of 1979 to 2012.**

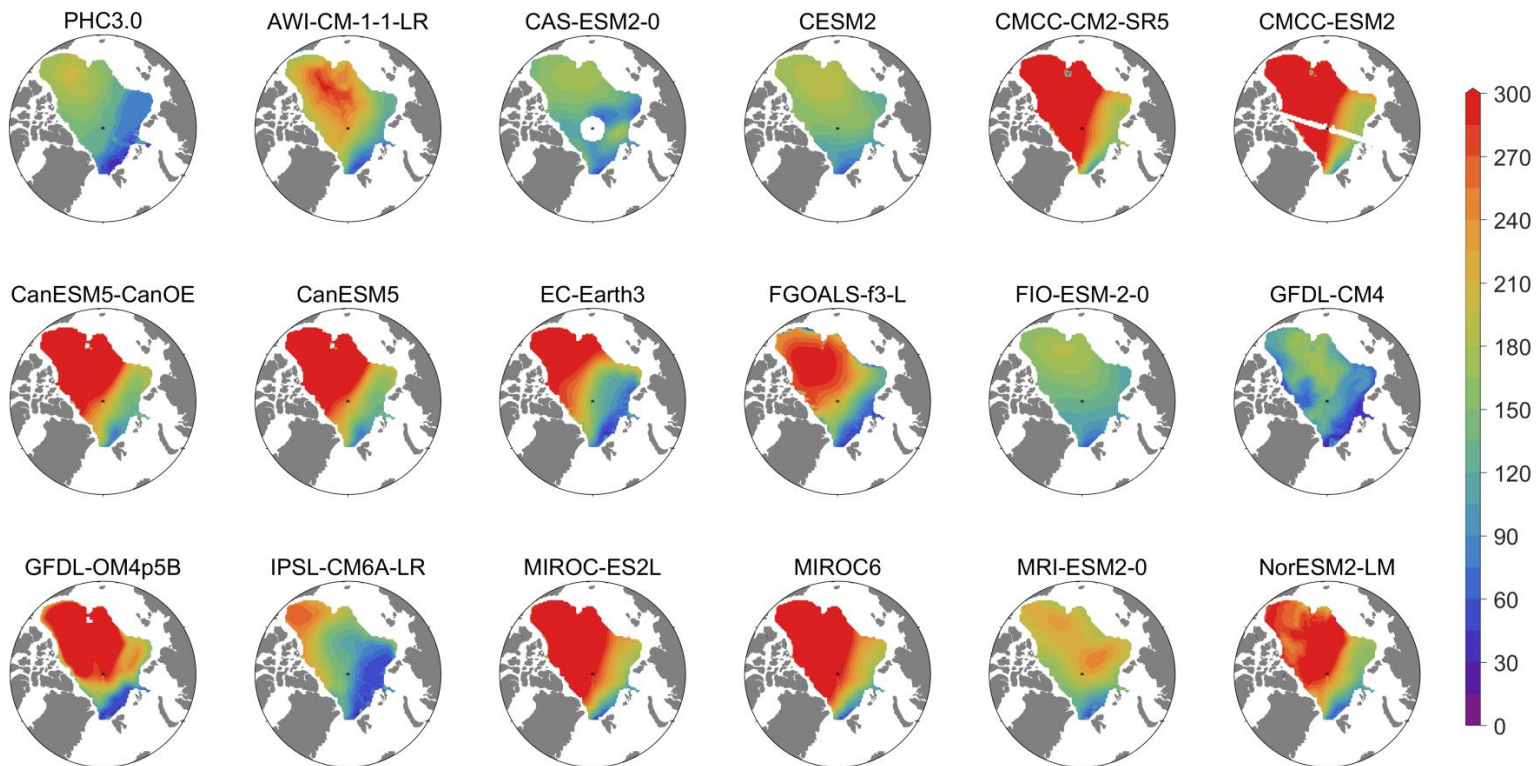

40

Figure S9. Cold halocline base depth (unit: m) from PHC3.0 climatology and OMIP-1 models average over 1971 to 2000.

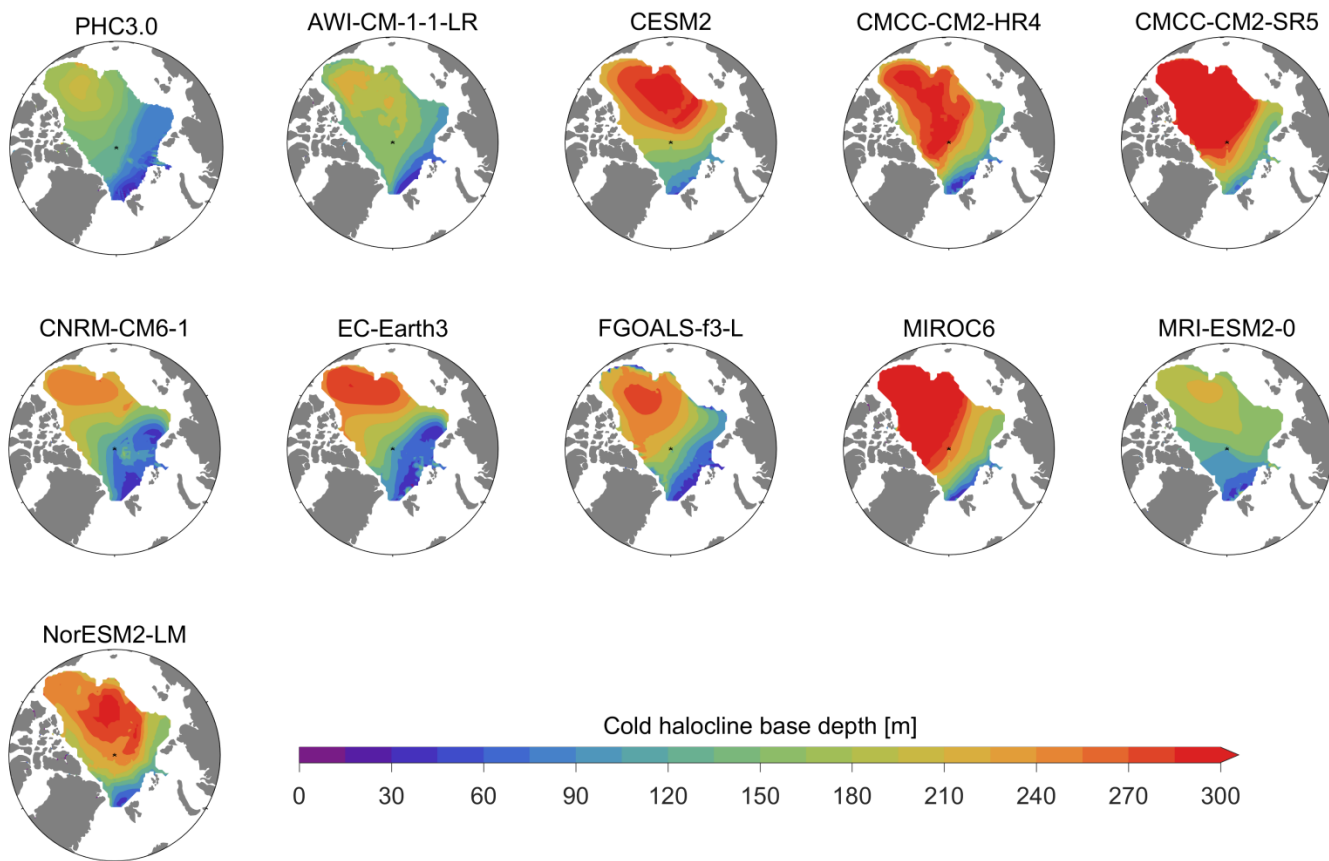

**Figure S10. Cold halocline base depth (unit: m) from PHC3.0 climatology and OMIP-2 models average over 1971 to 2000.**

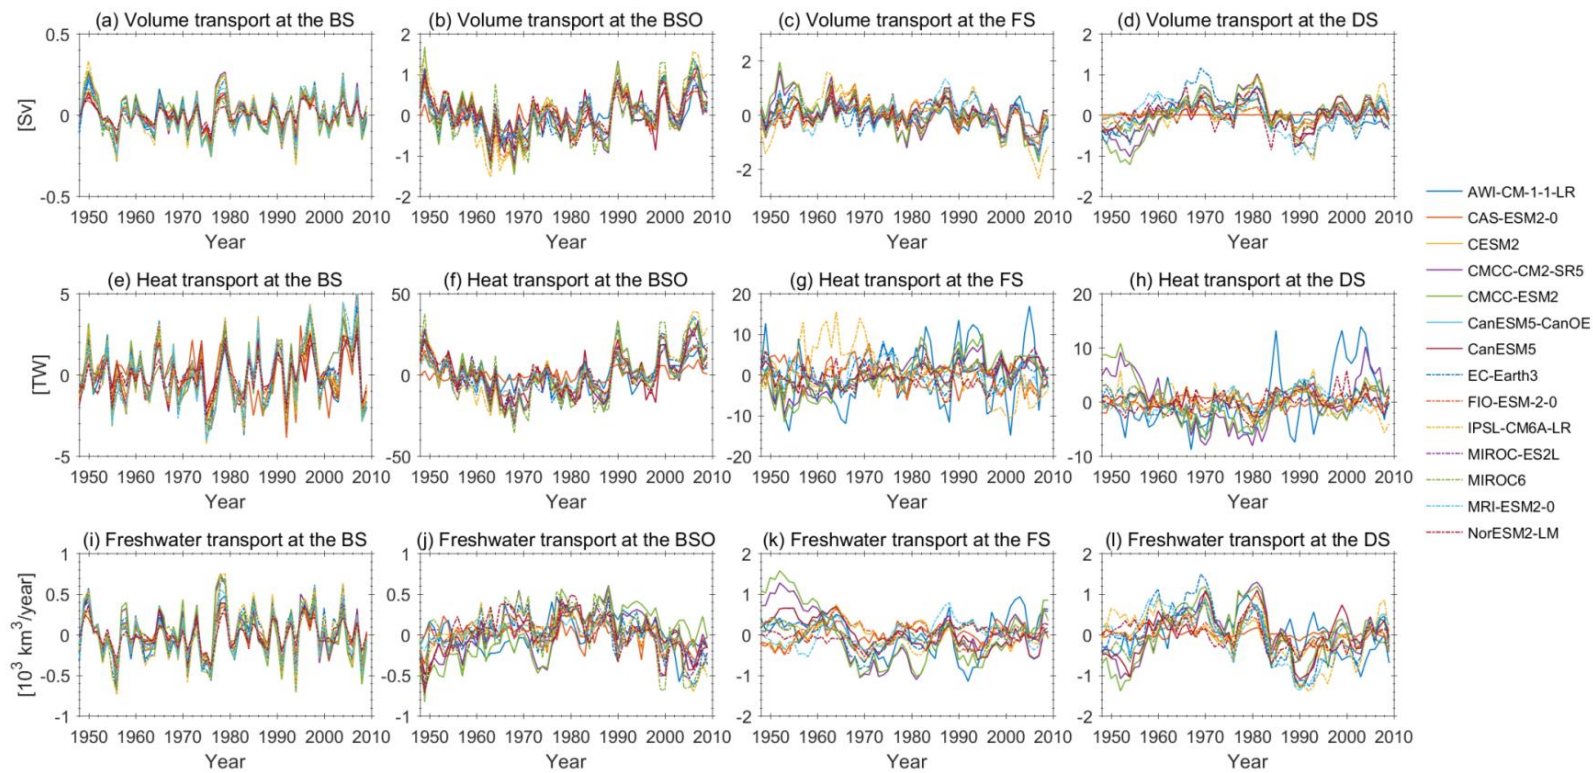

45 **Figure S11. Ocean volume, heat, and liquid freshwater transport anomalies through the Bering Strait (BS), Barents Sea Opening (BSO), Fram Strait (FS), and Davis Strait (DS) in OMIP-1.**

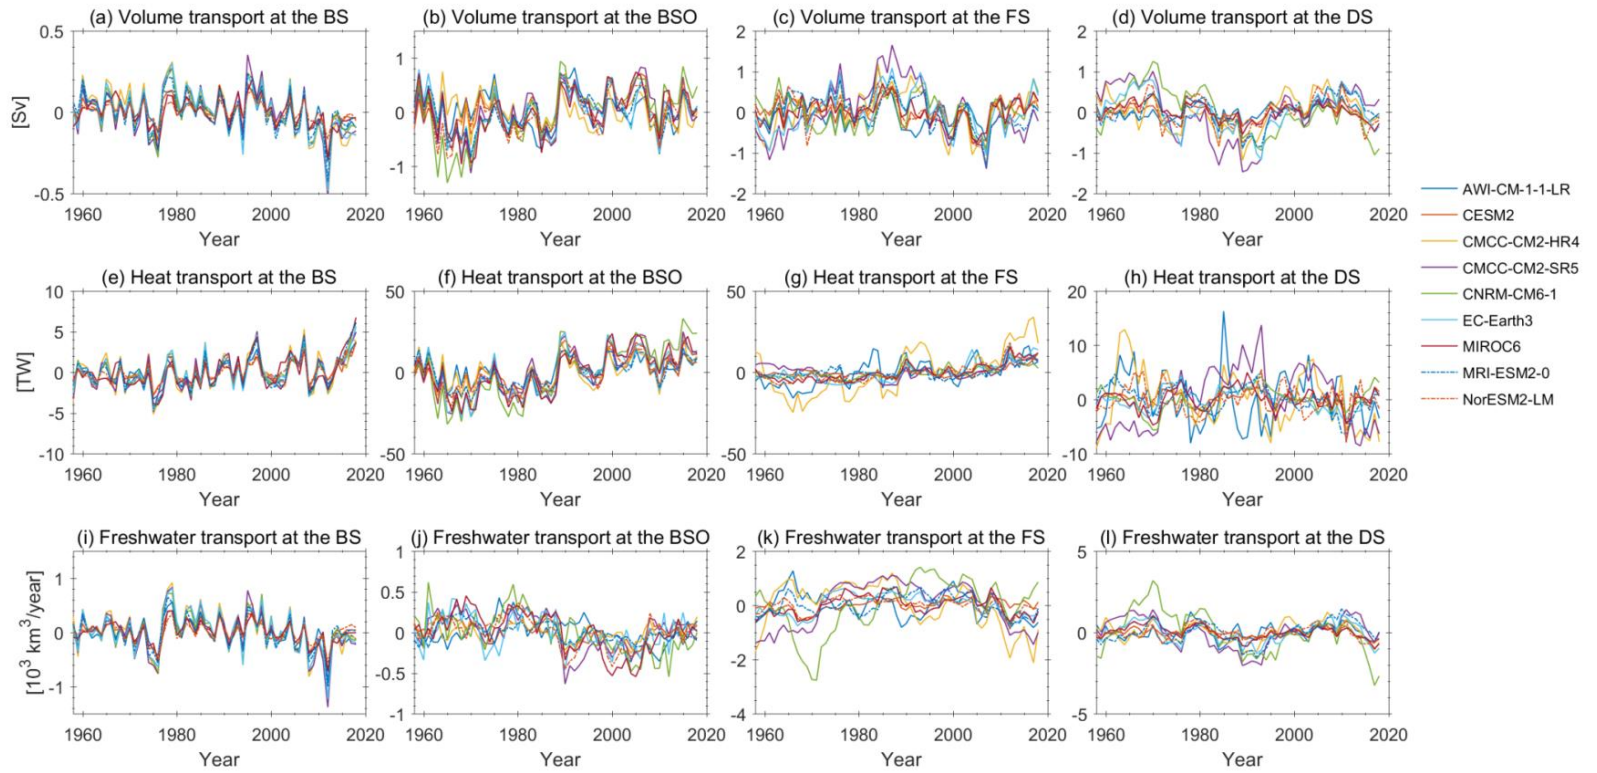

**Figure S12. Ocean volume, heat, and liquid freshwater transport anomalies through the Bering Strait (BS), Barents Sea Opening (BSO), Fram Strait (FS), and Davis Strait (DS) in OMIP-2.**
